1 Quantifying and understanding well-to-well contamination in microbiome research

2

3 Jeremiah J Minich<sup>1</sup>, Jon G Sanders<sup>2</sup>, Amnon Amir<sup>2</sup>, Greg Humphrey<sup>2</sup>, Jack Gilbert<sup>3</sup>, and  
4 Rob Knight<sup>2,4,5</sup>

5

6 Affiliations:

7 1. Marine Biology Research Division, Scripps Institution of Oceanography, University of  
8 California San Diego, La Jolla, CA 92093, USA

9 2. Department of Pediatrics, University of California San Diego, La Jolla, CA 92093,  
10 USA

11 3. Department of Ecology and Evolution and Department of Surgery, University of  
12 Chicago, Chicago, IL 60637, USA

13 4. Center for Microbiome Innovation, Jacobs School of Engineering, University of  
14 California San Diego, La Jolla, CA 92093, USA

15 5. Department of Computer Science and Engineering, University of California San  
16 Diego, La Jolla, CA 92093, USA

17

18 Authors for correspondence:

19 1. Dr. Rob Knight, PhD

20 Professor, Director of Center for Microbiome Innovation

21 University of California San Diego

22 9500 Gilman Dr. La Jolla, CA 92093

23 Tel: (858)-822-2379; Fax (858)-246-1981

24 E-mail: [robknight@ucsd.edu](mailto:robknight@ucsd.edu)

25 Journal: mSystems

26 Section: Microbiome

27 Track: Novel Systems Biology

28 Research Article

29

30

31 Main text word count (excluding abstract): 3842

32

33

34

35

36

37

38

39

40

41

42

43 **Abstract:**

44 Microbial sequences inferred as belonging to one sample may not have originated from  
45 that sample. Such contamination may arise from laboratory or reagent sources or from  
46 physical exchange between samples. This study seeks to rigorously assess the  
47 behavior of this often-neglected between-sample contamination. Using unique bacteria  
48 each assigned a particular well in a plate, we assess the frequency at which sequences  
49 from each source appears in other wells. We evaluate the effects of different DNA  
50 extraction methods performed in two labs using a consistent plate layout including  
51 blanks, low biomass, and high biomass samples. Well-to-well contamination occurred  
52 primarily during DNA extraction, and to a lesser extent in library preparation, while  
53 barcode leakage was negligible. Labs differed in the levels of contamination. DNA  
54 extraction methods differed in their occurrences and levels of well-to-well contamination,  
55 with robotic methods having more well-to-well contamination while manual methods  
56 having higher background contaminants. Well-to-well contamination was observed to  
57 occur primarily in neighboring samples, with rare events up to 10 wells apart. The effect  
58 of well-to-well was greatest in samples with lower biomass, and negatively impacted  
59 metrics of alpha and beta diversity. Our work emphasizes that sample contamination is  
60 a combination of crosstalk from nearby wells and background contaminants. To reduce  
61 well-to-well effects, samples should be randomized across plates, and samples of  
62 similar biomass processed together. Researchers should evaluate well-to-well  
63 contamination in study design and avoid removal of taxa or OTUs appearing in negative  
64 controls, as many will be microbes from other samples rather than reagent  
65 contaminants.

66  
67  
68

69 **Importance:**

70 Microbiome research has uncovered magnificent biological and chemical stories across  
71 nearly all areas of life science, at times creating controversy when findings reveal  
72 fantastic descriptions of microbes living and even thriving in once thought to be sterile  
73 environments. Scientists have refuted many of these claims because of contamination,  
74 which has led to robust requirements including use of controls for validating accurate  
75 portrayals of microbial communities. In this study, we describe a previously  
76 undocumented form of contamination, well-to-well contamination and show that  
77 contamination primarily occurs during DNA extraction rather than PCR, is highest in  
78 plate-based methods as compared to single tube extraction, and occurs in higher  
79 frequency in low biomass samples. This finding has profound importance on the field as  
80 many current techniques to 'decontaminate' a dataset simply relies on an assumption  
81 that microbial reads found in blanks are contaminants from 'outside' namely the  
82 reagents or consumables.

83

84 Keywords: microbiome, contamination, 16S rRNA gene, metagenomics, built-  
85 environment, genomics, low-biomass

86 **Introduction:**

87

88 Massively high-throughput sequencing has enabled fundamental changes to the study  
89 of microbial ecology. Increased throughput and sequencing depth has empowered  
90 researchers to utilize multiplexing to increase sample sizes to thousands per study [1–  
91 6]. However, new ways of knowing require new understanding of potential flaws and  
92 confounds. Many studies have addressed computational and statistical challenges  
93 associated with analyzing 16S rRNA gene sequence data, including the impacts of  
94 sequence similarity clustering [7], diversity estimation, and data compositionality [8], to  
95 name just a few. There has also been substantial effort to reduce confounding  
96 experimental effects via standardization of microbiome sample processing methods,  
97 including sample collection, preservation [9], DNA extraction [10–12], library preparation  
98 [6,13–17] and sequencing [5]. Together, these approaches have facilitated large-scale  
99 metaanalyses such as the Earth Microbiome Project ‘EMP’ (earthmicrobiome.org) [2].  
100 Despite these efforts, a significant amount of experimental noise remains in any given  
101 microbiome study.

102  
103 Contamination, or the observation of sequence reads in a sample coming from  
104 microbes that weren’t originally part of that sample, remains one of the most pernicious  
105 types of experimental noise. Microbial rRNA gene copies can be found even in ‘sterile’  
106 reagents, leading to that presence of background signal derived from DNA extraction  
107 kits [18], PCR mastermix [19], and other consumables [20]. It is now widely understood  
108 that such contaminants must be considered in microbiome analyses, especially when  
109 dealing with low-biomass samples where contaminant rRNA gene copies make up a  
110 larger fraction of the community [7,21–25]. Various engineering strategies have been  
111 proposed and are utilized to minimize contamination including physical separation of  
112 rooms used for DNA extractions and PCR, wearing additional PPE [26] to cover skin to  
113 prevent technician-induced contaminants, UV sterilization of plastic consumables or  
114 reagents, or ethidium oxide treatment of consumables [20].

115  
116 Beyond physically limiting contamination, the use of positive and negative controls is  
117 increasingly being used to assess and quantify contamination in a study, allowing for  
118 the potential of contaminant removal in silico [27]. Methods such as Katharoseq [11],  
119 utilize the ratio of read counts and composition of positive and negative controls, to  
120 determine criteria for sample inclusion. Others have emphasized the importance of  
121 including negative controls to understand background contamination [28]. Based on the  
122 idea that contaminants are primarily derived from external sources, some have  
123 proposed the strategy of simply identifying this ‘contaminome’ profile and then removing  
124 them from the dataset [29]. This, however fails to contend with the potential that  
125 contaminants may arise from other samples within a study itself. Such between-sample  
126 contamination has been observed as a product of ‘barcode-swapping’ between samples  
127 as a byproduct of Illumina ex-Amp sequencing reactions, and has also been suggested  
128 to arise from improper assignment of barcodes to neighboring clusters in image  
129 processing [30]. Anecdotally, we have also observed instances that appear to arise from  
130 physical cross-contamination of samples. Since most DNA extractions and PCR  
131 reactions are performed on multiple samples at once, often times in 96-well format, we  
132 reasoned it would be important to take into consideration that nearby samples could in  
133 fact contribute to contamination of negative controls.

134  
135 To evaluate this hidden factor of contamination, we designed an experiment to  
136 empirically characterize the frequency and nature of well-to-well contamination using  
137 different DNA extraction and sample handling protocols. By placing 16 unique bacterial  
138 “source” isolates at high biomass in individual wells across plates of alternating low-  
139 biomass “sink” bacteria and no-template blank wells, we were able to observe and  
140 quantify well-to-well transfer events under different scenarios, including automated  
141 plate-based extraction and manual tube-based extraction protocols. We further included  
142 libraries from an additional, unique, isolate that were extracted and amplified separately  
143 to account for potential instrument-based cross-contamination mechanisms such as  
144 barcode-swapping or miss-assignment. To further validate results, we processed an  
145 additional two 96-well plates at another microbiome facility.

146  
147 **Results:**

148  
149 We designed a 96-well plate layout containing 16 unique source bacteria (~10,000,000  
150 cells per well, corresponding to  $10^8$  cells  $\text{ml}^{-1}$ ), 24 sink wells (containing *V. fischeri* at  
151 ~100,000 cells per well,  $10^6$  cells  $\text{ml}^{-1}$ ) and 48 blank wells (Figure 1a). At UCSD, a total  
152 of three replicate sample plates were DNA extracted: two using the Epmotion5075 with  
153 magnetic bead cleanups on Kingfisher robots (Plate 1, Plate 2) and one manually with  
154 column cleanups (Tube). All three plates were then processed each with two unique  
155 PCR plates in triplicate as outlined (Figure 1). In addition, 16 gDNA replicates of a  
156 *Clostridium* isolate were processed on its own 96-well plate and amplified in a separate  
157 PCR reaction, to allow for detection of instrument-based barcode miss-assignment. A  
158 mock community comprised of all source isolates and the sink isolate was created and  
159 then serially diluted and processed as well to validate sample amplification. Details on  
160 the actual plate map patterns can be found in Additional file 1 for all eight PCR plates. A  
161 total of 3,756,064 reads from 713 samples resulted in 6305 features. A summary table  
162 was generated to describe well-to-well and background contamination occurrences  
163 across the samples (Additional Table 1). One of the 16 source microbes was highly  
164 contaminated with background contaminants and did not produce the expected  
165 sequence results, but was included in the analysis as we did not want to bias our  
166 results.

167  
168 Well-to well contamination events were analyzed by counting fraction of reads from a  
169 given source well appearing in other source wells, low biomass sink wells, or blanks. In  
170 our setup, well-to-well contamination was visualized to occur in all six PCR replicate  
171 plates in both labs. Based on the visualized plate patterns, the pattern of well-to-well  
172 contamination was observed to be higher in plate extractions compared to tube  
173 extractions, and was more prominent in wells directly surrounding the source well,  
174 suggesting a physical mechanism for well-to-well contamination (Figure 2). We  
175 quantified the distance by measuring contamination counts as a function of the  
176 Pythagorean distance from the source well, and determined that the highest rates of  
177 contamination occurred in the immediate proximate wells for both plate and tube  
178 extractions, but with a stronger distance-decay relationship for the plate vs. the tube

179 extractions (Figure 3). The supplementation of Antifoam-A to wells during DNA  
180 extraction did not reduce well-to-well contamination (Additional file 2).

181  
182 Another possible contributing source of inter-sample contamination is barcode leakage,  
183 i.e. reads originating from a given sample being identified as originating from a different  
184 sample due to read errors in the barcode. Such “barcode-hopping” behavior has been  
185 observed in labs using 8 bp barcodes in the Microbiome Quality Control project [31]. In  
186 order to quantify the contribution of such events in our 12 bp barcode design, we  
187 designed another plate containing 16 replicate wells of a single *Clostridium* isolate.  
188 Since these samples were sequenced together with the PCR replicate plates, barcode  
189 leakage would be expected to result in *Clostridium* reads appearing in the PCR  
190 replicate plates samples. Barcode leakage was quantified by counting the number of  
191 reads originating from barcodes not present in the plate, and no such reads were  
192 observed, indicating that for the 12 bp Golay error correcting barcodes sequenced in  
193 these conditions, this is a very rare event (less than 1 in 3.75E6 reads), and is not a  
194 contributing factor to inter-sample contamination.

195  
196 To further quantify the total effect of well-to-well contamination, we compared the  
197 proportion of microbial community source for each sample across the three DNA  
198 extraction plates (plate 1, plate 2, and tube) and for each of the two PCR replicate  
199 plates (PCRA and PCRB) from each extraction (Figure 4). Contamination frequency and  
200 relative abundance was highest in plate 1 followed by plate 2 and lowest in the tube  
201 plate (Additional file 3). NTCs were composed of primarily background contaminants in  
202 the tube extractions for both PCR replicates (median fraction of well-to-well reads 0).  
203 However, in some plate extraction NTCs, the majority of reads originated from well-to-  
204 well reads (median fraction of well-to-well reads of 0.78, 0.9, 0.44 and 0.77 for plate 1:  
205 PCRA, PCRB; plate 2: PCRA, PCRB respectively) (Additional file 4). Sink wells were  
206 also partially contaminated with source microbes, particularly in the Plate 1 replicate.  
207 The total occurrence (prevalence) of well-to-well contamination across the various  
208 sample types and extraction methods along with summarizing compositional effects of  
209 well-to-well contaminants on samples (mean, median and max) is detailed in Additional  
210 Table 2. For NTCs, 47.5% of blanks from tubes and 95.7% of blanks from plate  
211 extractions had well-to-well contamination. For low biomass samples, 15.0% of sink  
212 wells from tubes and 67.4% of sink wells from plate extractions had well-to-well  
213 contamination (Table 1).

214  
215 To determine if DNA extraction method (tube vs plate) had an impact on well-to-well  
216 contamination, we compared relative abundances of well-to-well contaminants for  
217 NTCs, sink, and source samples independently (Figure 5a). Well-to-well contamination  
218 was affected by extraction method, and was generally higher in plate-based extractions  
219 compared to manual single tube extractions (Kruskal-Wallis  $P < 0.0001$ , Figure 5a).  
220 Further, the proportion of well-to-well contamination was greater in samples with lower  
221 starting biomass (NTCs, 0-100 cells and sinks, approximately 100,000 cells) than in  
222 source wells, which had higher starting biomass (approximately 10,000,000 cells) while  
223 controlling for extraction method (Figure 5b). Well-to-well contamination was greatest in  
224 samples with lower microbial biomass.

225  
226 In order to validate these results in an independent lab, in addition to the samples  
227 processed at UCSD, we sent away bacterial samples to be processed at an outside  
228 facility using the manual single tube extraction and plate extraction (although due to  
229 available facilities both utilized a column cleanup step rather than magnetic beads). All  
230 results for replicate PCR plates and robot extraction replication were summarized for  
231 overall comparison purposes (Table 1). While controlling for site (UCSD only), the total  
232 fraction of reads from samples (mean, median, and max out of 100%) caused by well-  
233 to-well contamination was highest in NTCs followed by sink and lastly source microbes  
234 for both the tube (NTC: 4.57%, 0%, 56.0%; sink: 0.05%, 0.0%, 2.78%; source: 0.13%,  
235 0.01%, 2.99%) and plate (NTC: 58.26%, 65.79%, 100.0%; sink: 6.9%, 0.078%, 15.61%;  
236 source: 0.94%, 0.04%, 50.67%) extraction methods (Table 1 and Figure 4). The NTCs  
237 of samples processed outside of UCSD had well-to-well contamination consistent with  
238 the other tube methods while the sink samples had higher well-to-well contamination  
239 and overall background contamination than both tube and plate processed samples at  
240 UCSD (Table 1).

241  
242 Since well-to-well contamination can introduce additional bacteria to samples, it has the  
243 potential to inflate alpha and decrease resolution in beta diversity metrics, especially for  
244 binary metrics (such as number of observed species, Jaccard dissimilarity, or  
245 unweighted UniFrac distance). While all of our source and sink control samples should  
246 have only had one unique sOTU, richness was typically much higher than this due to  
247 contamination including background kit contaminants along with well-to-well  
248 contaminants. We calculated the total richness per sample, which should have been  
249 one, and determined the percentage of that richness which was due to well-to-well  
250 contamination. Both well-to-well contaminants and background kit contaminants  
251 contribute to this inflated richness. Controlling for site (UCSD only), we determined that  
252 well-to-well contamination inflated richness estimates for both tube and plate extracted  
253 samples by contributing to on average (0.96%, 12.7%; tube, plate) of sink sample  
254 richness and (6.51%, 13.76%; tube, plate) of source sample richness.

255  
256 We next assessed the impact of well-to-well contamination on beta-diversity  
257 measurements of the communities. Specifically, for each unique DNA extraction plate,  
258 we performed pairwise well\_ID comparisons of the PCR replicates for each of the three  
259 sample types including NTCs, sink, and source microbes. Because well-to-well  
260 contamination generally only made up a small proportion of the total reads of each  
261 sample, binary metrics (which tend to emphasize the impact of rare taxa) were more  
262 affected than abundance-weighted metrics. (Additional file 5).

263  
264 To further elaborate on this observation and quantify where well-to-well contamination  
265 was coming from (PCR process only or DNA extraction), we compared replicate plates  
266 which were processed using the robot. This included two separate DNA extraction  
267 plates and then two PCR plates for each extraction plate. For each PCR replicate plate,  
268 96 pairwise distances were computed and categorized by sample type for each of the  
269 two DNA extraction plates (light red shade Additional file 5b). In addition, the pairwise  
270 distances from each of the 96 wells of the two replicate DNA extraction plates

271 processed on the robots were also compared for the PCR replicate plate PCRA only.  
272 We found much less between-PCR than between-extraction variance, indicating that the  
273 combination of stochastic effects plus well-to-well contamination for DNA extraction is  
274 greater than for stochastic effects plus well-to-well for PCR (Additional file 5b).

275

## 276 **Discussion:**

277

278 Understanding experimental biases or noise in microbiome research is critical to  
279 drawing accurate inferences of the microbial world. Since microbes are everywhere [2],  
280 it is extremely important to limit and ideally eliminate false positives in sample  
281 signatures. Contamination is a combination of background contaminants (DNA  
282 extraction kits, PCR mastermixes, and enzymes), processing contaminants (equipment,  
283 air, technicians), and plate contaminants (well-to-well contamination). In this study, we  
284 showed that well-to-well contamination can play a major role in microbiome studies,  
285 especially when using plate-based DNA extraction methods and for samples with low  
286 starting biomass. This type of contamination is difficult to detect and relatively  
287 infrequently discussed, but should be considered when designing and evaluating  
288 research. The majority of research to date has focused on identifying microbial  
289 contaminants in reagents and consumables [12,18,21] and subsequently using  
290 bioinformatics techniques to simply subtract out these contaminant taxa [22,27,32].  
291 Existing tools to remove contaminant taxa or OTUs (operational-taxonomic units) from a  
292 dataset largely focus on these background contaminants, and don't yet consider the  
293 case of contamination from proximal wells [27]. We show in this study that a large  
294 fraction of reads in the blank (NTC) samples originate from neighboring wells. In this  
295 study, we observed that contamination between samples can account for a significant  
296 fraction of the overall observed diversity in a sample, especially for no-template control  
297 blanks that are physically adjacent to relatively high-biomass samples. Given this, the  
298 simple approach of removing any taxa found in blanks is likely to remove the most  
299 prominent "real" taxa in a dataset. More sophisticated methods using additional  
300 information (such as the 'decontam' package [27]) are absolutely necessary in the face  
301 of well-to-well contamination, even for addressing the problem of reagent contaminants.

302

303 Identifying and removing well-to-well contamination *in silico* is challenging, as  
304 contamination events between wells are largely independent, and thus cannot be  
305 statistically identified and removed across a study in the same way that reagent  
306 contaminants are. However, several observations from this experiment should help  
307 researchers in planning experiments to minimize its effects. First, plate-based DNA  
308 extractions are much more susceptible to well-to-well contamination than the more  
309 painstaking tube-based extractions; for critical experiments, automated plate-based  
310 extractions should be carefully reconsidered. Second, even for tube-based extractions,  
311 well-to-well contamination was greatest in wells immediately adjacent to the source.  
312 Thus, sample location on plates should be explicitly considered in experimental design.  
313 When plating samples for extraction, it is important to block and/or randomize  
314 treatments across 96-well plates. Third, well-to-well contamination has the greatest  
315 impact in low-biomass samples, especially when they are processed adjacent to high-

316 biomass samples that can act as sources. Because of this, it is important to have an  
317 awareness of the absolute concentration of microbial cells in samples, and to ensure  
318 that only samples of similar biomass are processed together. Lastly, when analyzing  
319 datasets, it is important to be aware that different methods will have different  
320 sensitivities to well-to-well contamination. For example, alpha-diversity estimates can be  
321 highly inflated by well-to-well contamination in samples with low starting diversity; and  
322 for beta-diversity estimates, binary metrics such as Jaccard or unweighted UniFrac are  
323 more likely to be affected than abundance-weighted metrics. Other experimental  
324 approaches to reduce the impacts of well-to-well contamination bear further  
325 investigation. These might include use of higher-fidelity liquid handling approaches [33],  
326 or broader adoption of unique-per-sample positive control spike-ins to allow the direct  
327 observation and statistical disambiguation of cross-contamination [34]. Methods which  
328 rely on identifying and subtracting putative contaminants from datasets need to be used  
329 with extreme caution, particularly if the identified sequence variants are present in  
330 primary samples.

331  
332 Understanding experimental noise is extremely important for improving and guiding  
333 microbiome research best practices [23,24]. Specifically, addressing ‘hot’ negative  
334 controls is one of the great challenges to genomics based research. Since well-to-well  
335 contamination is an important component of this, we emphasize that for any given  
336 experiment, it is critical to identify any kit-specific background contaminants in a lot to  
337 best accurately remove contaminant taxa. While we have good power to estimate  
338 frequency of well-to-well contamination in our assays, extrapolating the frequency of  
339 well-to-well contamination in assays from other labs and methods is still a challenge.  
340 This suggests that while we can generalize to well-to-well contamination being a  
341 widespread problem, we can’t generalize the quantities or specifics. Further, this argues  
342 for other labs spending the effort to do similar in-house tests to evaluate their own  
343 pipelines. To identify these background contaminants, we recommend using a variety of  
344 positive controls titrations both at the DNA extraction stage and PCR stage [11].  
345 Companies which manufacture high-throughput DNA extraction will need to invest in  
346 research and development to reduce well-to-well contamination. Lastly, measuring and  
347 accounting for well-to-well contamination identification and reduction will be critical for  
348 diagnostic research going forward [35–40].

349  
350 Conclusions:

351  
352 Contamination is a serious impediment to reproducibility in any genomics study,  
353 particularly microbiome research. As emerging diagnostic tests for environmental health  
354 and human health become more mainstream, it will be crucial for these tests to address  
355 variability in microbiome signal due to well-to-well contamination. Our study identified  
356 and quantified a previously undetected source of contamination in microbiome studies.  
357 We show that intensity of well-to-well contamination varies per extraction method with  
358 plate-based methods and lower biomass samples having higher rates of contamination.



359 Our findings demonstrate the importance for the community to accept standards to best  
360 monitor and quantify these sources of noise in a given study.

361

## 362 **Methods:**

363

### 364 **Sample collection and processing**

365 A total of 17 bacterial isolates including *Brevibacterium sp*, *Corynebacterium stationis*,  
366 *Brachybacterium sp*, *Arthrobacter sp*, *Propionibacterium acnes*, *Bacillus sp*,  
367 *Staphylococcus equorum*, *Staphylococcus succinus*, *Streptococcus angiosis*,  
368 *Desulfovibrio sulfodismutans*, *Serratia sp*, *Halomonas sp*, *Psychrobacter sp*,  
369 *Pseudomonas fragi*, *Vibrio rumo*, *Eschericia coli*, and *Vibrio fischeri* were collected and  
370 stored in PBS solution. The optical density, OD600, was measured for all isolates and  
371 the corresponding cell density estimated. Sixteen of these microbes (all except *V.*  
372 *fischeri*) were diluted to a final density of 1e8 cells per ml in a single 50 ml conical vial  
373 and were designated as 'source' organisms. The *V. fischeri* isolate was diluted to 1e6  
374 cells per ml, designated as the 'sink' microbe, and stored in a single 50 ml conical. Both  
375 source and sink microbes were stored in a -80 °C freezer until making aliquots for  
376 extractions. In addition, a mock community was created using these isolates by  
377 combining equal volume of all samples which also served as a reference for accounting  
378 for processing biases. An additional isolate of *Clostridium sp*. was measured and  
379 aliquoted into 16 different 2 ml tubes to be used for barcode testing. For DNA extraction  
380 at UCSD, 100 ul of 'source' and 'sink' samples were aliquoted into 2 96-well DNA  
381 extraction robot plates and 96 2-ml bead beating extraction tubes as indicated in the  
382 diagram (Additional file 1, Figure 1a). Following the Earth Microbiome Project protocol  
383 [2], the Qiagen PowerMag kit (Qiagen, Cat# 27500-4-EP) was used for robot extractions  
384 while the Qiagen DNeasy PowerSoil kit (Qiagen, Cat# 12888-100) was used for  
385 'manual, single-tube' extractions. To test the effect of antifoam on reducing well-to-well  
386 contamination, we added 2 ul of antifoam-A concentrate (Sigma-Aldrich, Cat#A5633-  
387 25G) to half of each of the robot plates (Figure 1b-c). In addition to processing samples  
388 at UCSD, an additional 192 samples were plated (96) in a 96-well plate and 96  
389 individual 2-ml bead beating tubes and sent to Argonne National lab in the same  
390 platemap scheme. The manual tube samples were processed using the Qiagen DNeasy  
391 PowerSoil kit (Qiagen, Cat# 12888-100) while the manual plate samples were  
392 processed using the Qiagen DNeasy PowerSoil HTP 96 kit (Qiagen, Cat# 12955-4).

393

### 394 **Amplicon sequencing**

395 To distinguish between well-to-well contamination derived from DNA extraction versus  
396 PCR setup, each UCSD processed DNA extraction plate (2 robot plates and 1 manual  
397 plate) were subjected to two separate triplicate PCR reactions (Figure 1b-d). The mock  
398 community dilution plate and barcode testing plate were processed with a single  
399 triplicate PCR reaction each. The EMP 16S rRNA V4 primers 515f/806rB were used to  
400 amplify the samples. Equal concentrations of amplicons from each sample from all 8  
401 plates were pooled and sequenced using a MiSeq [5,13,14]. The 192 samples DNA  
402 extracted at Argonne were processed using the same EMP primers and method but on  
403 a separate MiSeq run. Amplicon data was uploaded to Qiita [41] and processed with

404 Qiime 1.9.1 [42]. Exact sequence tags from the first read were generated using the  
405 deblur pipeline under default parameters as described in the publication [43].

406

### 407 **Statistical analysis**

408 Sequences processed with deblur were positively filtered against the reference  
409 database as part of the default workflow in deblur. In addition, singleton sequences  
410 were omitted from the dataset. The dataset was not rarified in order to best quantify  
411 well-to-well contamination for all samples processed. The sequence tags were identified  
412 for all of the positive controls used in this study and included in supplement (Additional  
413 Table 2). Sequences which did not have 100% match to those original controls were  
414 considered 'background contaminants' whereas the *Vibrio fischeri* deemed as 'sink  
415 microbes' and the 16 unique isolates deemed collectively as 'source microbes'. For  
416 each of the 16 source microbes, 1 sink microbe, and 1 barcode leakage microbe, a  
417 custom script was used to generate 96-well plate maps to visualize well-to-well  
418 contamination. The distances of microbial dispersal 'jumping' was then calculated for  
419 each individual isolate using a custom script. Summary statistics of read counts,  
420 richness, and contamination metrics are summarized (Additional Table 3). To determine  
421 if well-to-well contamination was higher in robot compared to manual extractions, the  
422 composition of well-to-well contaminants was compared within NTCs, sink, and source  
423 independently, using the Kruskal-Wallis test. Further, to determine if well-to-well  
424 contamination was associated or more frequent with lower biomass samples, well-to-  
425 well composition was compared across the NTCs, sink, and source within each  
426 extraction method independently using Kruskal-Wallis test.

427

428 To determine the impact of well-to-well contamination on beta-diversity microbiome  
429 analyses, we calculated distance metrics of both Bray-Curtis [44,45] and Jaccard [46]  
430 and compared within categories. The three different extraction plates each had two  
431 separate PCR plates processed. The pairwise distances of unique Well\_ID was  
432 calculated using both metrics for each of the two PCR plates belonging to each of the  
433 three DNA extraction plates. Sample types were grouped into NTCs (non-template  
434 control or blank), sink, or source. Within each group, the distances were compared  
435 using the Mann-Whitney test. To calculate effects for the entire pipeline which includes  
436 both PCR and DNA extraction, we combined the pairwise distances of the Well\_IDs for  
437 each of the three DNA extraction plates (robot 1, robot 2, and manual) and grouped by  
438 sample type (NTC, sink, or source). Again, we compared the total dissimilarities of Bray-  
439 Curtis vs. Jaccard for each sample type using Mann-Whitney test.

440

### 441 **List of abbreviations**

442 EMP: Earth Microbiome Project

443 NTC: non-template control (sterile water blanks)

444 sOTU: sub-operational taxonomic unit

445 sink: lower biomass microbial isolate used in experiment (approximately 100,000 cells)

446 source: higher biomass microbial isolate (1 of 16) (approximately 10,000,000 cells)

447 Well\_ID: refers to the well position (in a 96-well plate: A1-A12 → H1-H12) from which  
448 the sample was processed

449

450  
451  
452  
453  
454  
455  
456  
457  
458  
459  
460  
461  
462  
463  
464  
465  
466  
467  
468  
469  
470  
471  
472  
473  
474  
475  
476  
477  
478  
479  
480  
481  
482  
483  
484  
485  
486  
487  
488  
489  
490  
491  
492  
493  
494  
495

**Declarations:**

Funding:  
?

Acknowledgements: Thanks to Argonne National lab for processing samples.

Data availability and materials:

All data is made publically available on (Qiita ID 10401) and will be uploaded to public database ENA upon acceptance.

Author contributions:

JJM, AA, JS, GH, RK designed experiment

JJM, GH, JG processed samples

JJM, AA, JS analyzed and interpreted results

AA, JS developed custom scripts for various platemap analyses and distance-k

JJM, AA, JS, RK helped to write the manuscript

Ethics approval:

Not applicable

Consent for publication:

Not applicable

Competing interest:

The authors declare that they have no competing interest.

496  
497  
498  
499  
500  
501  
502  
503  
504  
505  
506  
507  
508  
509  
510  
511  
512  
513  
514  
515  
516  
517  
518  
519  
520  
521  
522  
523  
524  
525  
526  
527  
528  
529  
530  
531  
532  
533  
534  
535  
536  
537  
538  
539  
540  
541

**Additional files**

Supplemental Table S1 (full characterization of w2w and metadata)

Supplemental Table S2. Summary statistics on well-to-well contamination across DNA

Supplemental Figure S1: Platemap descriptions of experimental design

Supplemental Figure S 2: The use of antifoam (antifoam = 1) does not reduce well-to-well contamination

Supplemental Figure S 3: Sources of contamination (well-to-well and background contaminants) across manual and robot extraction plate and PCR replicate plates. Summary of compositionality of NTCs (n=48) vs. sink (n=32) vs. source microbes (n=16) processed in two facilities across five DNA extraction plates (a) UCSD tube extraction, (b) UCSD plate extraction 1, (c) UCSD plate extraction 2, (d) Argonne tube extraction, (e) Argonne plate extraction. UCSD DNA extractions were processed each twice thus had two PCR per plate (PCR A, PCR B).

Supplemental Figure S 4: Summary composition of reads (median, inter-quartile range) of specific sample types: NTCs, sink, or source microbes.

Supplemental Figure S 5. Determining the origin of well-to-well contamination and its impact on distance metrics from 96 unique WellIDs across three DNA extraction plates and six PCR plates. (a) Summary comparison of use of compositional (Bray-Curtis) or presence-absence (binary Jaccard) to describe microbial communities from NTCs (red), sink microbes (lower biomass), or source microbes (higher biomass). (b) Determining the effects of well-to-well contamination from PCR processing only (PCR replicates) compared to the entire process of DNA extraction and PCR (DNA extraction replicates). The statistical tests are performed on dark colors only while lightly shaded bars indicate the replicates for robot extraction plates.

542 **Figure Legends:**

543

544 Fig 1: Plate design, experimental design. (a) ntc 'white', sink 'purple', and source 'green'  
545 samples are distributed in a checkboard pattern across the plate. Antifoam A is added  
546 to last half (b) and first half (c) of the 96-well plates processed with the robot. The  
547 manual samples did not get antifoam A. Each unique DNA extraction plate is processed  
548 in duplicate PCR plates.

549

550 Fig 2: Example of plates with cross contamination; Each panel depicts a 96-well plate  
551 with source, sink and blank wells denoted by "X", "O" empty squares respectively.  
552 Colors indicate the number of reads from a specific bacteria (*Psychrobacter spp.*,  
553 present in well E5). Panels a,b c,d and e,f correspond to two PCR replicates of robotic  
554 extraction 1,2 and manual extraction respectively.

555

556 Fig 3: Distance decay relationship

557

558 Fig 4: Summary statistics of sample fraction composition of well-to-well contaminants  
559 compared across extraction types (blanks - pink, sink - blue, source - purple) and  
560 across extraction methods (tube vs. plate). Samples processed at UCSD in circles with  
561 no outline and samples processed at Argonne as circles with dark border. All samples  
562 with 0 well-to-well contamination occurrences are given a count of 0.00001 to enable  
563 visualization on graph (labeled 0 counts). Median and interquartile range are displayed  
564 in black lines over the data points.

565

566 Fig 5: Well-to-well effect size. Proportion of sample containing well-to-well contaminants  
567 as organized by (a) sample type (ntc, sink, source) and (b) extraction method. Statistical  
568 analysis within bars performed using Kruskal-Wallis non-parametric testing.

569

570

571

572

573

574

575

576

577

578

579

580

581

582

583

584

585

586

587 REFERENCES:

- 588 1. McDonald D, Hyde E, Debelius JW, Morton JT, Gonzalez A, Ackermann G, et al.  
589 American Gut: an Open Platform for Citizen Science Microbiome Research. *mSystems*.  
590 2018;3.
- 591 2. Thompson LR, Sanders JG, McDonald D, Amir A, Ladau J, Locey KJ, et al. A  
592 communal catalogue reveals Earth's multiscale microbial diversity. *Nature* [Internet].  
593 2017 [cited 2017 Dec 22];551. Available from:  
594 <https://www.nature.com/articles/nature24621>
- 595 3. Consortium THMP, Huttenhower C, Gevers D, Knight R, Abubucker S, Badger JH, et  
596 al. Structure, function and diversity of the healthy human microbiome. *Nature*.  
597 2012;486:207–14.
- 598 4. Falony G, Joossens M, Vieira-Silva S, Wang J, Darzi Y, Faust K, et al. Population-  
599 level analysis of gut microbiome variation. *Science*. 2016;352:560–4.
- 600 5. Caporaso JG, Lauber CL, Walters WA, Berg-Lyons D, Huntley J, Fierer N, et al.  
601 Ultra-high-throughput microbial community analysis on the Illumina HiSeq and MiSeq  
602 platforms. *ISME J*. 2012;6:1621–4.
- 603 6. Minich JJ, Humphrey G, Benitez RAS, Sanders J, Swafford A, Allen EE, et al. High-  
604 Throughput Miniaturized 16S rRNA Amplicon Library Preparation Reduces Costs while  
605 Preserving Microbiome Integrity. *mSystems*. 2018;3:e00166-18.
- 606 7. Brooks JP, Edwards DJ, Harwich MD, Rivera MC, Fettweis JM, Serrano MG, et al.  
607 The truth about metagenomics: quantifying and counteracting bias in 16S rRNA studies.  
608 *BMC Microbiol*. 2015;15:66.
- 609 8. Morton JT, Sanders J, Quinn RA, McDonald D, Gonzalez A, Vázquez-Baeza Y, et al.  
610 Balance Trees Reveal Microbial Niche Differentiation. *mSystems*. 2017;2.
- 611 9. Song SJ, Amir A, Metcalf JL, Amato KR, Xu ZZ, Humphrey G, et al. Preservation  
612 Methods Differ in Fecal Microbiome Stability, Affecting Suitability for Field Studies.  
613 *mSystems*. 2016;1.
- 614 10. Marotz C, Amir A, Humphrey G, Gaffney J, Gogul G, Knight R. DNA extraction for  
615 streamlined metagenomics of diverse environmental samples. *BioTechniques*.  
616 2017;62:290–3.
- 617 11. Minich JJ, Zhu Q, Janssen S, Hendrickson R, Amir A, Vetter R, et al. KatharoSeq  
618 Enables High-Throughput Microbiome Analysis from Low-Biomass Samples.  
619 *mSystems*. 2018;3:e00218-17.
- 620 12. Eisenhofer R, Minich JJ, Marotz C, Cooper A, Knight R, Weyrich LS. Contamination  
621 in Low Microbial Biomass Microbiome Studies: Issues and Recommendations. *Trends*  
622 *Microbiol* [Internet]. 2018 [cited 2019 Jan 2]; Available from:  
623 <http://www.sciencedirect.com/science/article/pii/S0966842X18302531>

- 624 13. Walters W, Hyde ER, Berg-Lyons D, Ackermann G, Humphrey G, Parada A, et al.  
625 Improved Bacterial 16S rRNA Gene (V4 and V4-5) and Fungal Internal Transcribed  
626 Spacer Marker Gene Primers for Microbial Community Surveys. *mSystems*.  
627 2016;1:e00009-15.
- 628 14. Caporaso JG, Lauber CL, Walters WA, Berg-Lyons D, Lozupone CA, Turnbaugh  
629 PJ, et al. Global patterns of 16S rRNA diversity at a depth of millions of sequences per  
630 sample. *Proc Natl Acad Sci*. 2011;108:4516–22.
- 631 15. Parada AE, Needham DM, Fuhrman JA. Every base matters: assessing small  
632 subunit rRNA primers for marine microbiomes with mock communities, time series and  
633 global field samples. *Environ Microbiol*. 2016;18:1403–14.
- 634 16. Apprill A, McNally S, Parsons R, Weber L. Minor revision to V4 region SSU rRNA  
635 806R gene primer greatly increases detection of SAR11 bacterioplankton. *Aquat Microb  
636 Ecol*. 2015;75:129–37.
- 637 17. Amaral-Zettler LA, McCliment EA, Ducklow HW, Huse SM. A Method for Studying  
638 Protistan Diversity Using Massively Parallel Sequencing of V9 Hypervariable Regions of  
639 Small-Subunit Ribosomal RNA Genes. *PLOS ONE*. 2009;4:e6372.
- 640 18. Salter SJ, Cox MJ, Turek EM, Calus ST, Cookson WO, Moffatt MF, et al. Reagent  
641 and laboratory contamination can critically impact sequence-based microbiome  
642 analyses. *BMC Biol*. 2014;12:87.
- 643 19. Tilburg JJHC, Nabuurs-Franssen MH, van Hannen EJ, Horrevorts AM, Melchers  
644 WJG, Klaassen CHW. Contamination of commercial PCR master mix with DNA from  
645 *Coxiella burnetii*. *J Clin Microbiol*. 2010;48:4634–5.
- 646 20. Motley ST, Picuri JM, Crowder CD, Minich JJ, Hofstadler SA, Eshoo MW. Improved  
647 Multiple Displacement Amplification (iMDA) and Ultraclean Reagents. *BMC Genomics*.  
648 2014;15:443.
- 649 21. Goffau MC de, Lager S, Salter SJ, Wagner J, Kronbichler A, Charnock-Jones DS, et  
650 al. Recognizing the reagent microbiome. *Nat Microbiol*. 2018;3:851–3.
- 651 22. Weiss S, Amir A, Hyde ER, Metcalf JL, Song SJ, Knight R. Tracking down the  
652 sources of experimental contamination in microbiome studies. *Genome Biol*.  
653 2014;15:564.
- 654 23. Pollock J, Glendinning L, Wisedchanwet T, Watson M. The Madness of Microbiome:  
655 Attempting To Find Consensus “Best Practice” for 16S Microbiome Studies. *Appl  
656 Environ Microbiol*. 2018;84.
- 657 24. Knight R, Vrbanac A, Taylor BC, Aksenov A, Callewaert C, Debelius J, et al. Best  
658 practices for analysing microbiomes. *Nat Rev Microbiol*. 2018;16:410–22.

- 659 25. Mallick H, Ma S, Franzosa EA, Vatanen T, Morgan XC, Huttenhower C.  
660 Experimental design and quantitative analysis of microbial community multiomics.  
661 *Genome Biol.* 2017;18:228.
- 662 26. Sheils OM, Finn S, O’Leary JJ. Quality-control issues for PCR-based assays in the  
663 molecular laboratory. *Curr Diagn Pathol.* 2003;9:165–72.
- 664 27. Davis NM, Proctor DM, Holmes SP, Relman DA, Callahan BJ. Simple statistical  
665 identification and removal of contaminant sequences in marker-gene and  
666 metagenomics data. *Microbiome.* 2018;6:226.
- 667 28. Adams RI, Bateman AC, Bik HM, Meadow JF. Microbiota of the indoor environment:  
668 a meta-analysis. *Microbiome.* 2015;3:49.
- 669 29. Jervis-Bardy J, Leong LEX, Marri S, Smith RJ, Choo JM, Smith-Vaughan HC, et al.  
670 Deriving accurate microbiota profiles from human samples with low bacterial content  
671 through post-sequencing processing of Illumina MiSeq data. *Microbiome.* 2015;3:19.
- 672 30. Mitra A, Skrzypczak M, Ginalski K, Rowicka M. Strategies for Achieving High  
673 Sequencing Accuracy for Low Diversity Samples and Avoiding Sample Bleeding Using  
674 Illumina Platform. *PLOS ONE.* 2015;10:e0120520.  
675
- 676 31. Sinha R, Abu-Ali G, Vogtmann E, Fodor AA, Ren B, Amir A, et al. Assessment of  
677 variation in microbial community amplicon sequencing by the Microbiome Quality  
678 Control (MBQC) project consortium. *Nat Biotechnol.* 2017;35:1077–86.
- 679 32. Knights D, Kuczynski J, Charlson ES, Zaneveld J, Mozer MC, Collman RG, et al.  
680 Bayesian community-wide culture-independent microbial source tracking. *Nat Methods.*  
681 2011;8:761–3.
- 682 33. Cain-Hom C, Pabalate R, Pham A, Patel HN, Wiler R, Cox JC. Mammalian  
683 Genotyping Using Acoustic Droplet Ejection for Enhanced Data Reproducibility,  
684 Superior Throughput, and Minimized Cross-Contamination. *J Lab Autom.* 2016;21:37–  
685 48.
- 686 34. Quail MA, Smith M, Jackson D, Leonard S, Skelly T, Swerdlow HP, et al. SASI-Seq:  
687 sample assurance Spike-Ins, and highly differentiating 384 barcoding for Illumina  
688 sequencing. *BMC Genomics.* 2014;15:110.
- 689 35. Quinn RA, Navas-Molina JA, Hyde ER, Song SJ, Vázquez-Baeza Y, Humphrey G,  
690 et al. From Sample to Multi-Omics Conclusions in under 48 Hours. *mSystems.*  
691 2016;1:e00038-16.
- 692 36. Zitvogel L, Ma Y, Raoult D, Kroemer G, Gajewski TF. The microbiome in cancer  
693 immunotherapy: Diagnostic tools and therapeutic strategies. *Science.* 2018;359:1366–  
694 70.



- 695 37. Arumugam M, Raes J, Pelletier E, Le Paslier D, Yamada T, Mende DR, et al.  
696 Enterotypes of the human gut microbiome. *Nature*. 2011;473:174–80.
- 697 38. Mira A. Oral Microbiome Studies: Potential Diagnostic and Therapeutic Implications.  
698 *Adv Dent Res*. 2018;29:71–7.
- 699 39. Kitsios GD. Translating Lung Microbiome Profiles into the Next-Generation  
700 Diagnostic Gold Standard for Pneumonia: a Clinical Investigator’s Perspective.  
701 *mSystems*. 2018;3:e00153-17.
- 702 40. He Y, Wu W, Zheng H-M, Li P, McDonald D, Sheng H-F, et al. Regional variation  
703 limits applications of healthy gut microbiome reference ranges and disease models. *Nat*  
704 *Med*. 2018;24:1532.
- 705 41. Gonzalez A, Navas-Molina JA, Kosciolk T, McDonald D, Vázquez-Baeza Y,  
706 Ackermann G, et al. Qiita: rapid, web-enabled microbiome meta-analysis. *Nat Methods*.  
707 2018;15:796–8.
- 708 42. Caporaso JG, Kuczynski J, Stombaugh J, Bittinger K, Bushman FD, Costello EK, et  
709 al. QIIME allows analysis of high-throughput community sequencing data. *Nat Methods*.  
710 2010;7:335–6.
- 711 43. Amir A, McDonald D, Navas-Molina JA, Kopylova E, Morton JT, Zech Xu Z, et al.  
712 Deblur Rapidly Resolves Single-Nucleotide Community Sequence Patterns. *mSystems*.  
713 2017;2.
- 714 44. Beals EW. Bray-Curtis Ordination: An Effective Strategy for Analysis of Multivariate  
715 Ecological Data. *Adv Ecol Res*. 1984;14:1–55.
- 716 45. Bray JR, Curtis JT. An Ordination of the Upland Forest Communities of Southern  
717 Wisconsin. *Ecol Monogr*. 1957;27:325–49.
- 718 46. Jaccard P. The Distribution of the Flora in the Alpine Zone. *New Phytol*.  
719 1912;11:37–50.

720  
721  
722  
723  
724  
725  
726  
727  
728  
729  
730  
731  
732

Table 1. Summary of contamination (well-to-well and background) impact on NTCs, low biomass, and high biomass sample types

| Type                                                                                              | Location | Extract | (Well-to-well) |                |              |                                 |        |        | (background-kits)               |        |        |
|---------------------------------------------------------------------------------------------------|----------|---------|----------------|----------------|--------------|---------------------------------|--------|--------|---------------------------------|--------|--------|
|                                                                                                   |          |         | Prev mean      | Richness Total | Richness W2W | Composition (mean, median, max) |        |        | Composition (mean, median, max) |        |        |
| ntc(n)                                                                                            |          |         |                |                |              |                                 |        |        |                                 |        |        |
| 61                                                                                                | UCSD     | m_tube  | 0.4754         | 20             | 0.041        | 0.046                           | 0      | 0.56   | 0.9382                          | 1      | 1      |
| 32                                                                                                | Argonne  | m_tube  | 0.5313         | 165            | 0.016        | 0.009                           | 0.0003 | 0.0823 | 0.9915                          | 0.9997 | 1      |
| 28                                                                                                | Argonne  | m_plate | 0.1071         | 8              | 0.042        | 0.031                           | 0      | 0.7517 | 0.9686                          | 1      | 1      |
| 116                                                                                               | UCSD     | r_plate | 0.9569         | 15             | 0.278        | 0.583                           | 0.6579 | 1      | 0.3307                          | 0.2025 | 1      |
| sink(n)                                                                                           |          |         |                |                |              |                                 |        |        |                                 |        |        |
| 93                                                                                                | UCSD     | m_tube  | 0.1505         | 20             | 0.01         | 5E-04                           | 0      | 0.0278 | 0.0335                          | 0.0168 | 0.9873 |
| 48                                                                                                | Argonne  | m_tube  | 0.5            | 189            | 0.017        | 0.023                           | 0      | 0.5934 | 0.7808                          | 0.8382 | 0.9878 |
| 46                                                                                                | Argonne  | m_plate | 0.3261         | 16             | 0.066        | 0.14                            | 0      | 0.9871 | 0.5846                          | 0.6267 | 1      |
| 187                                                                                               | UCSD     | r_plate | 0.6738         | 15             | 0.127        | 0.007                           | 0.0008 | 0.1561 | 0.0091                          | 0.0023 | 0.4051 |
| source(n)                                                                                         |          |         |                |                |              |                                 |        |        |                                 |        |        |
| 31                                                                                                | UCSD     | m_tube  | 0.6129         | 18             | 0.065        | 0.001                           | 0.0001 | 0.0299 | 0.083                           | 0.0029 | 1      |
| 16                                                                                                | Argonne  | m_tube  | 0.875          | 21             | 0.138        | 2E-04                           | 0.0002 | 0.0007 | 0.1154                          | 0.0041 | 0.9998 |
| 16                                                                                                | Argonne  | m_plate | 0.8125         | 17             | 0.168        | 0.024                           | 0.0001 | 0.364  | 0.1313                          | 0.0032 | 0.9999 |
| 64                                                                                                | UCSD     | r_plate | 0.7031         | 12             | 0.138        | 0.009                           | 0.0004 | 0.5067 | 0.0732                          | 0.0016 | 1      |
| Prev-prevalence (number of samples with any well-to-well contamination / total number of samples) |          |         |                |                |              |                                 |        |        |                                 |        |        |
| Extract: DNA extraction method used                                                               |          |         |                |                |              |                                 |        |        |                                 |        |        |
| m-manual (non-robotic based extraction)                                                           |          |         |                |                |              |                                 |        |        |                                 |        |        |
| r-robot based DNA cleanup                                                                         |          |         |                |                |              |                                 |        |        |                                 |        |        |

**a**

● Vibrio sink (1/100)

● Source bacteria (unique each well)

○ Blank NTC

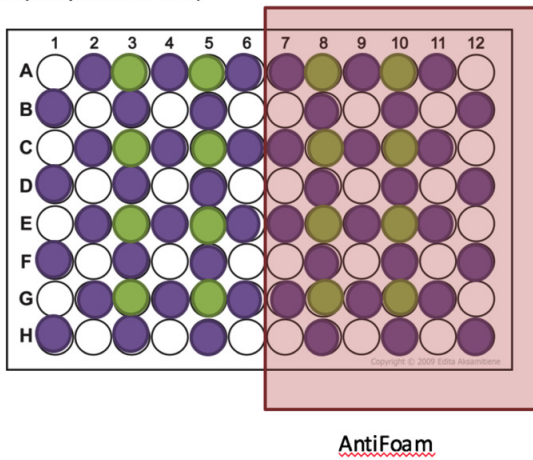

**b**

### DNA Extraction 1 (plate based)

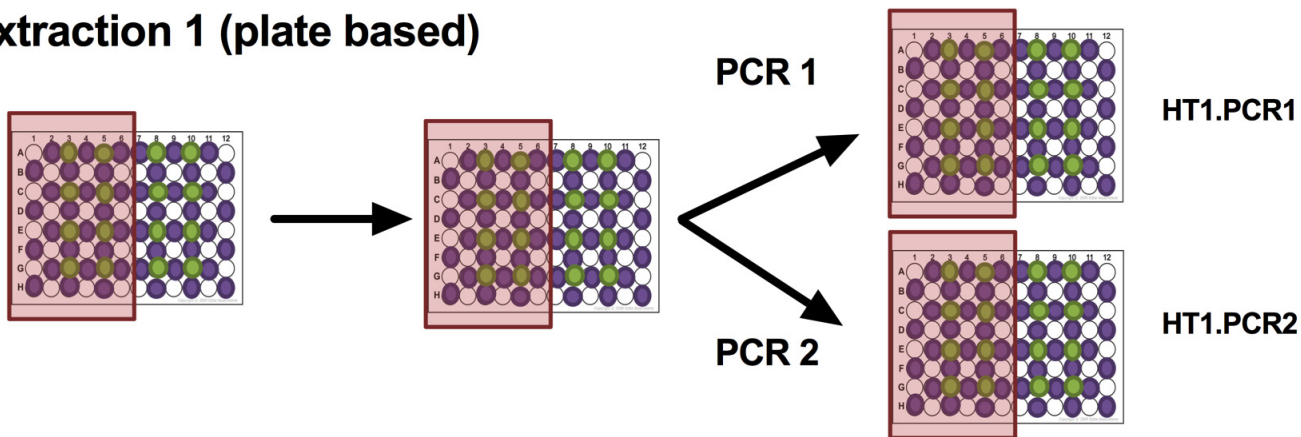

**c**

### DNA Extraction 2 (plate based)

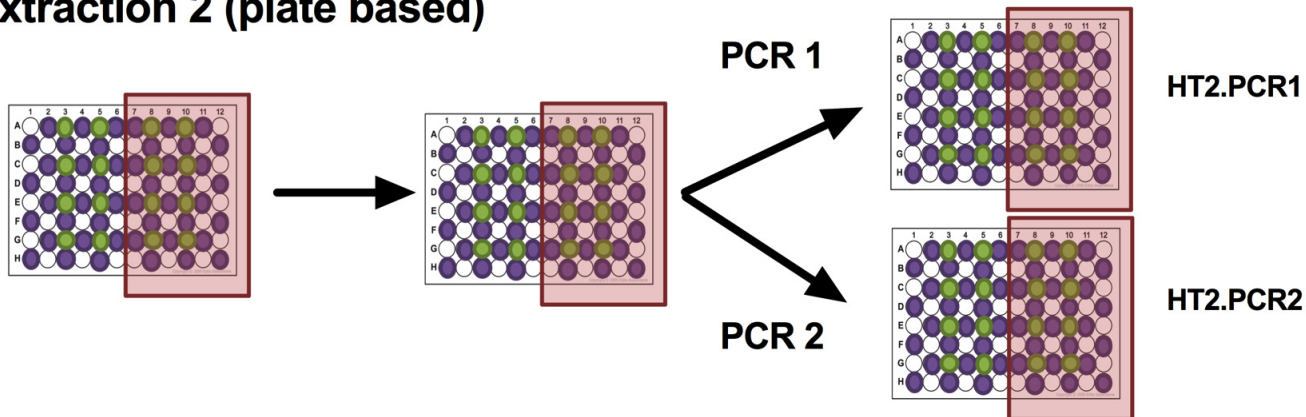

**d**

### DNA Extraction 3 (individual tube)

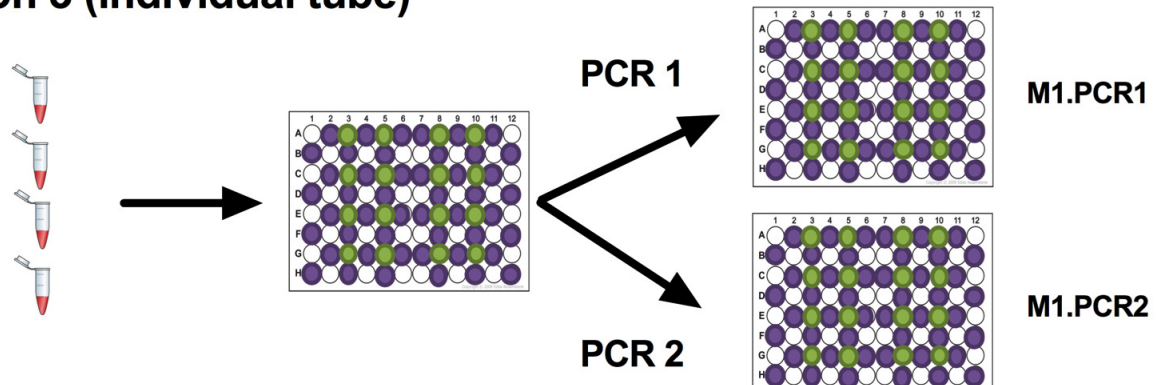

**Figure 1**

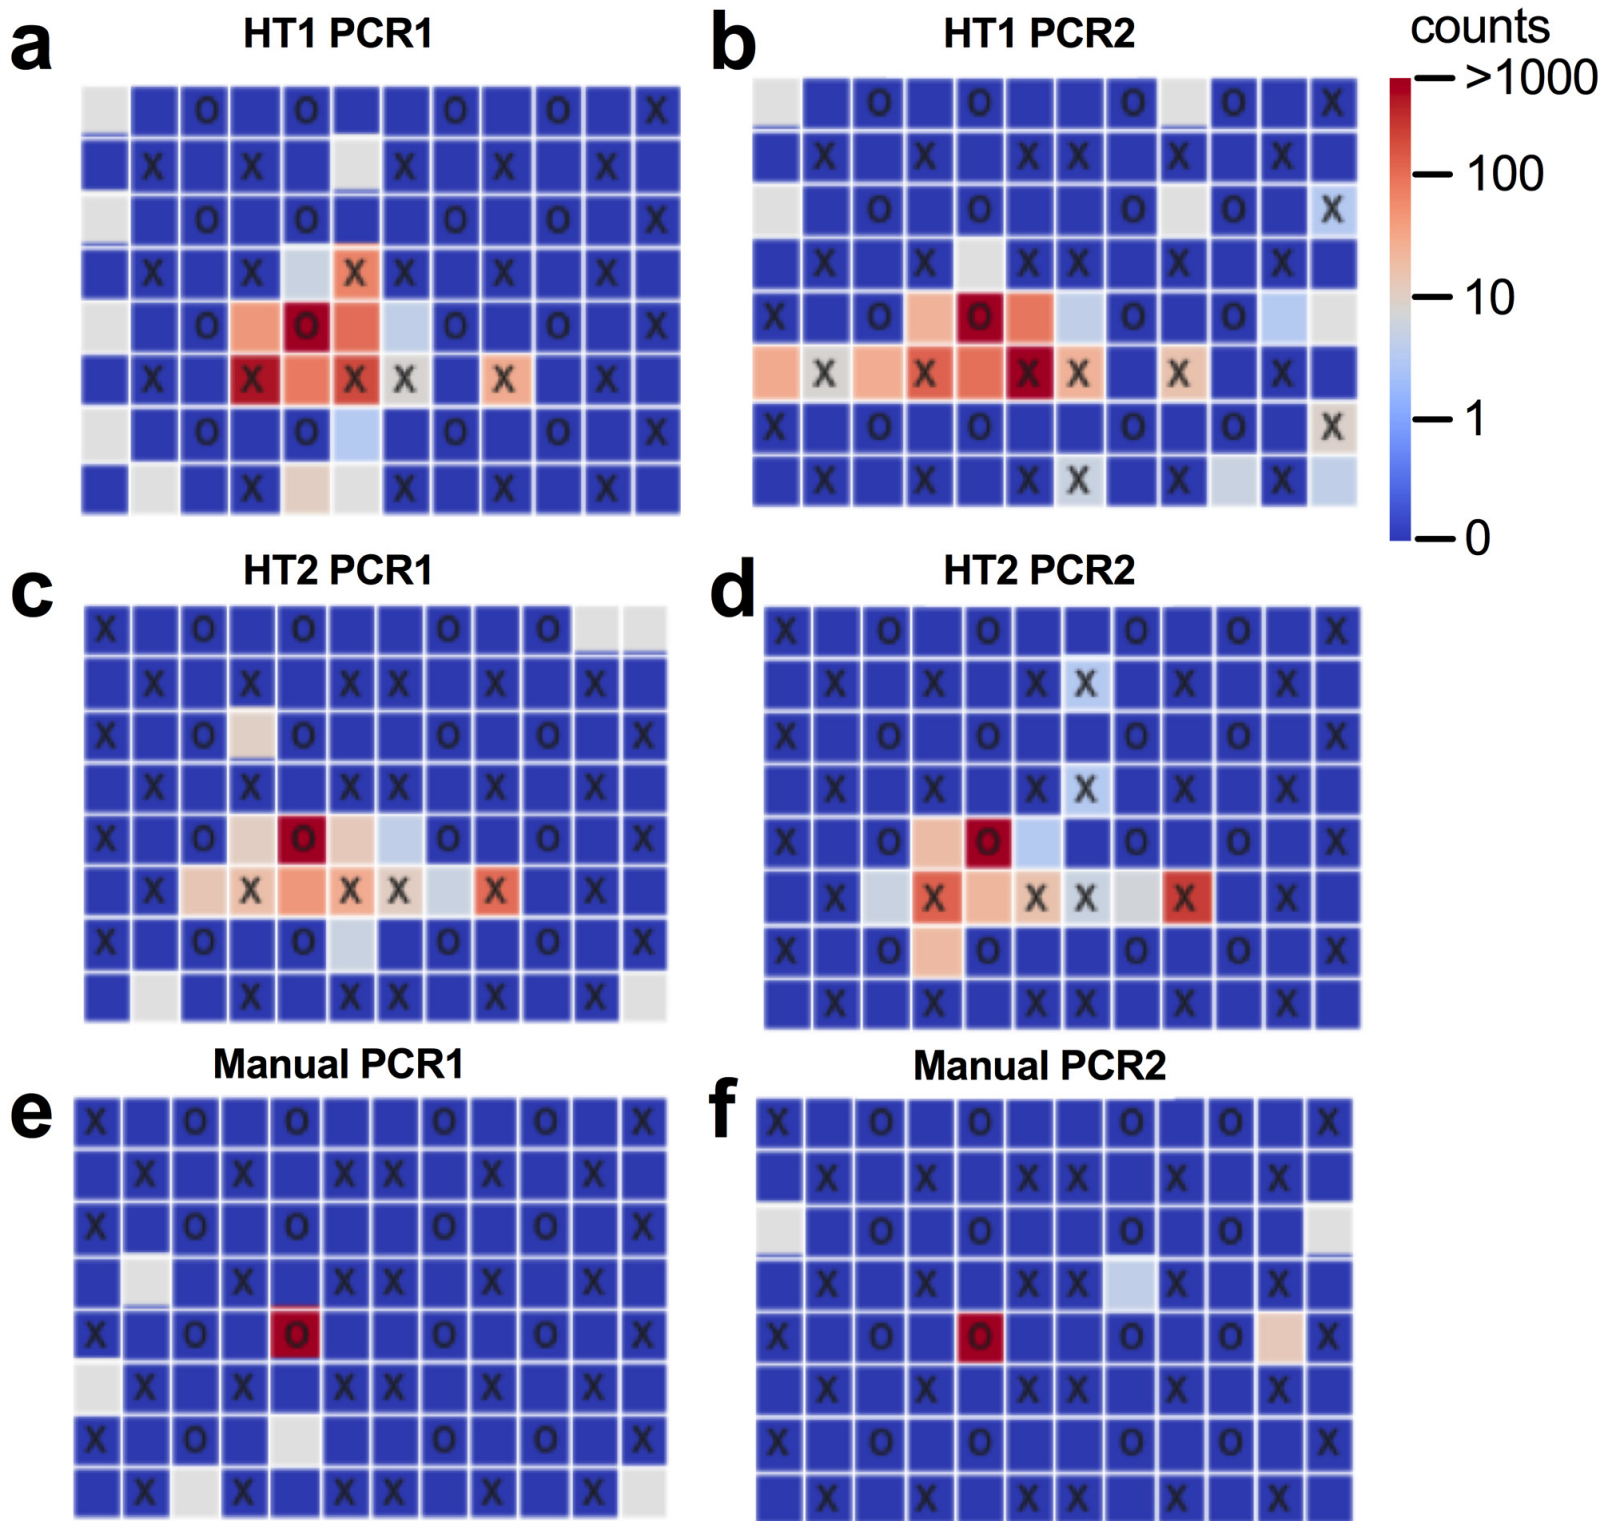

Figure 2

**a**

**Tube**

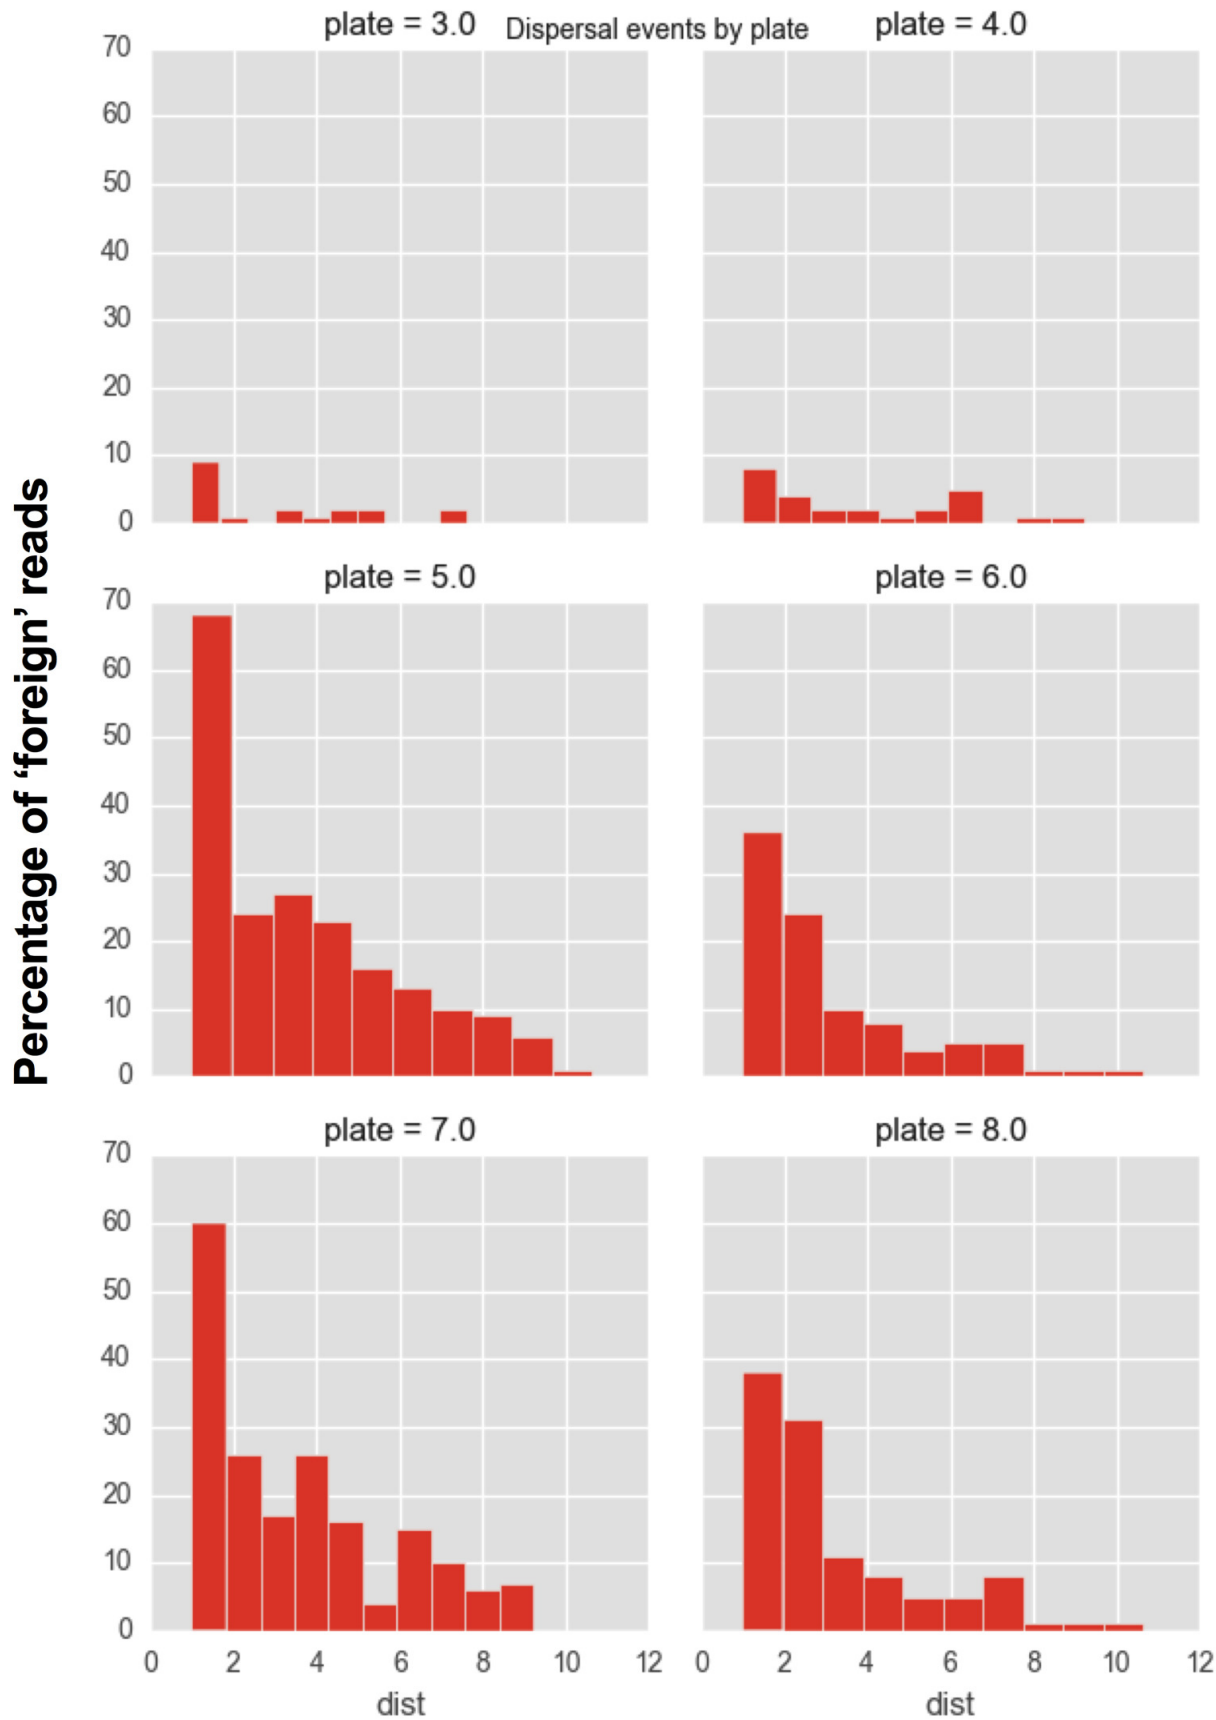

**Distance (number of wells) away from source spike in microbe**

**Figure 3**

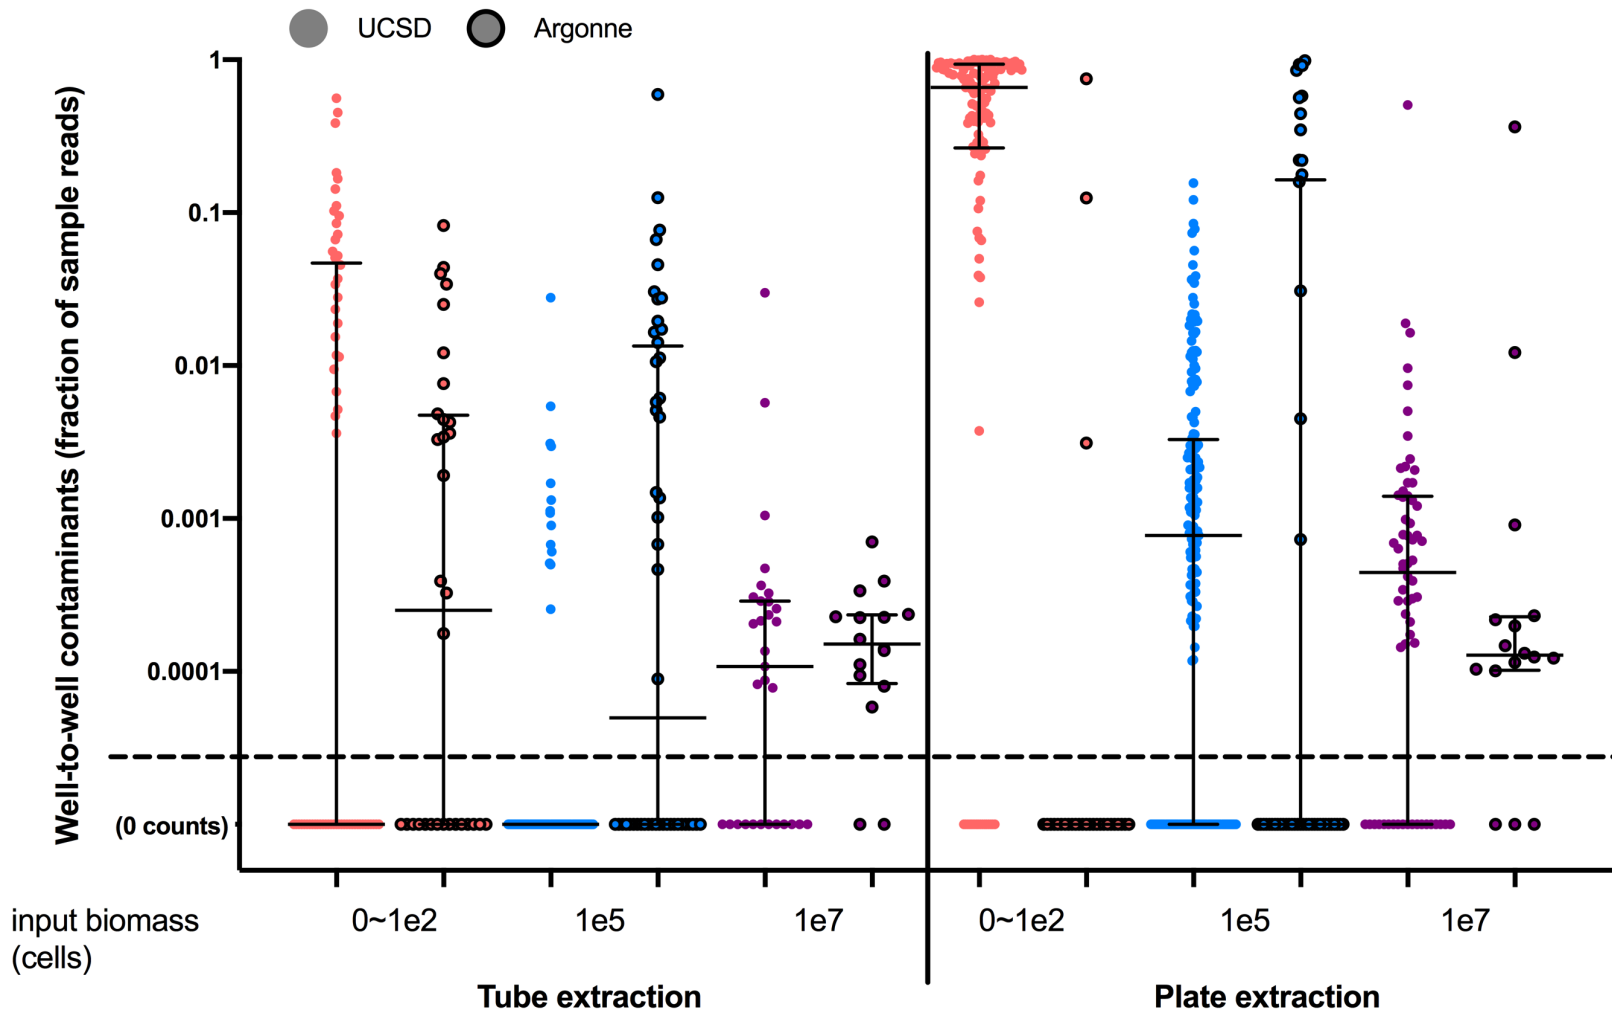

Figure 4

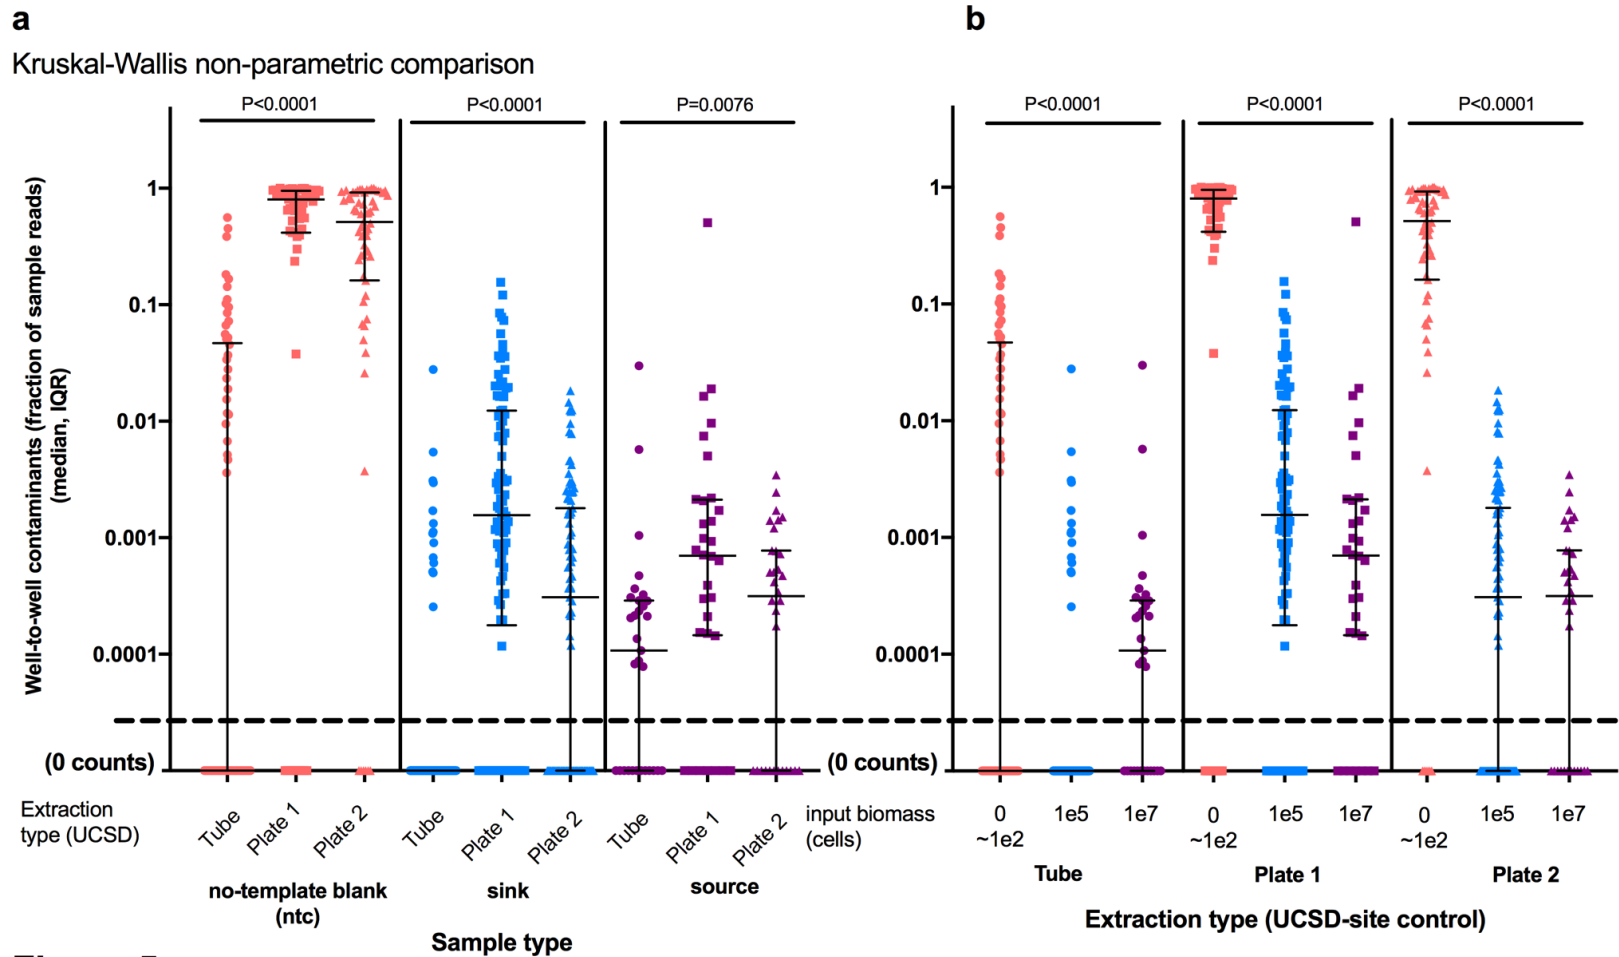

Source: http://biorxiv.org/content/10.1101/577718v1.full.pdf
